# Supplementary material
Source: PubMed Central journal article supplement (PMC6238749)
Supplement: jciinsight-3-123563-s121.pdf [file jciinsight-3-123563-s121.pdf]

A

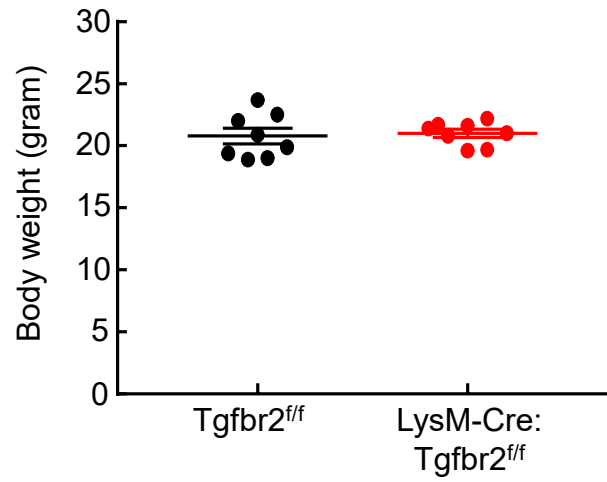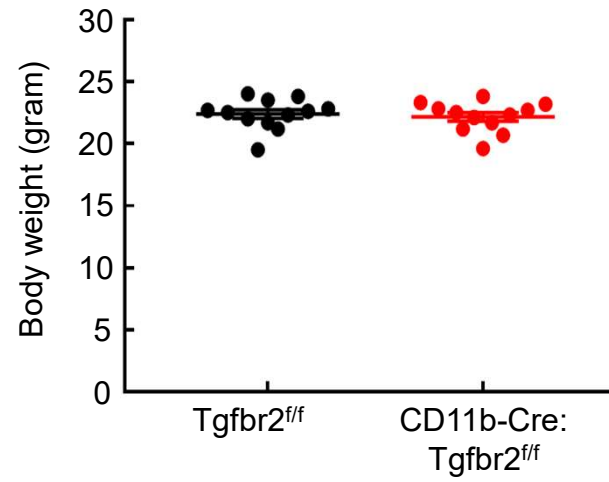

B

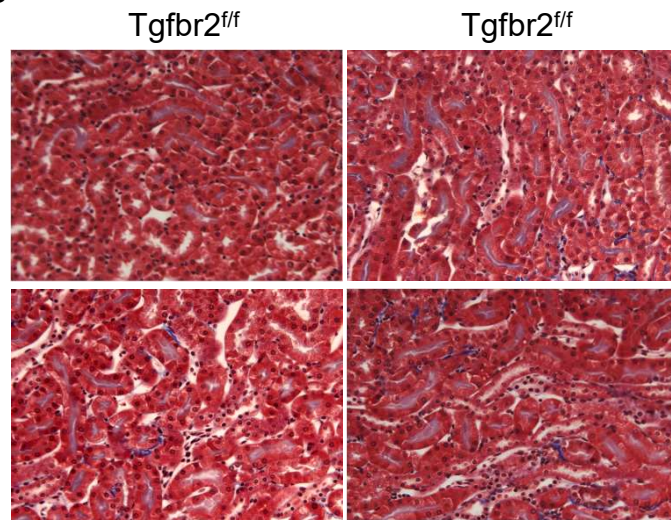

Masson's Trichrome staining: x 160

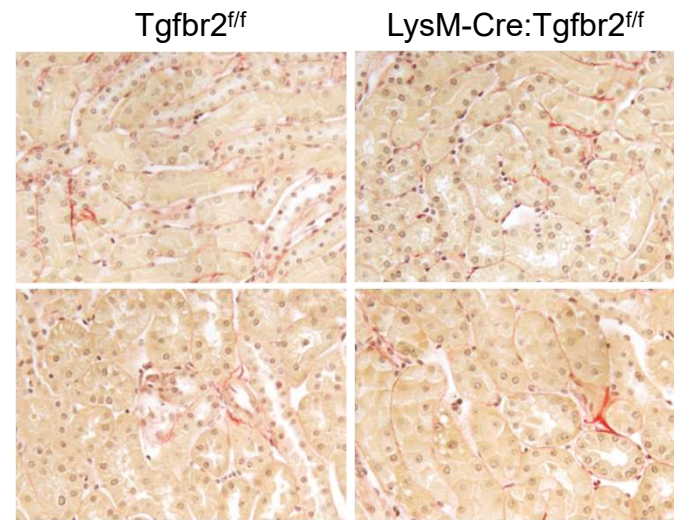

Sirius red staining: x 160

Supplemental Figure S1

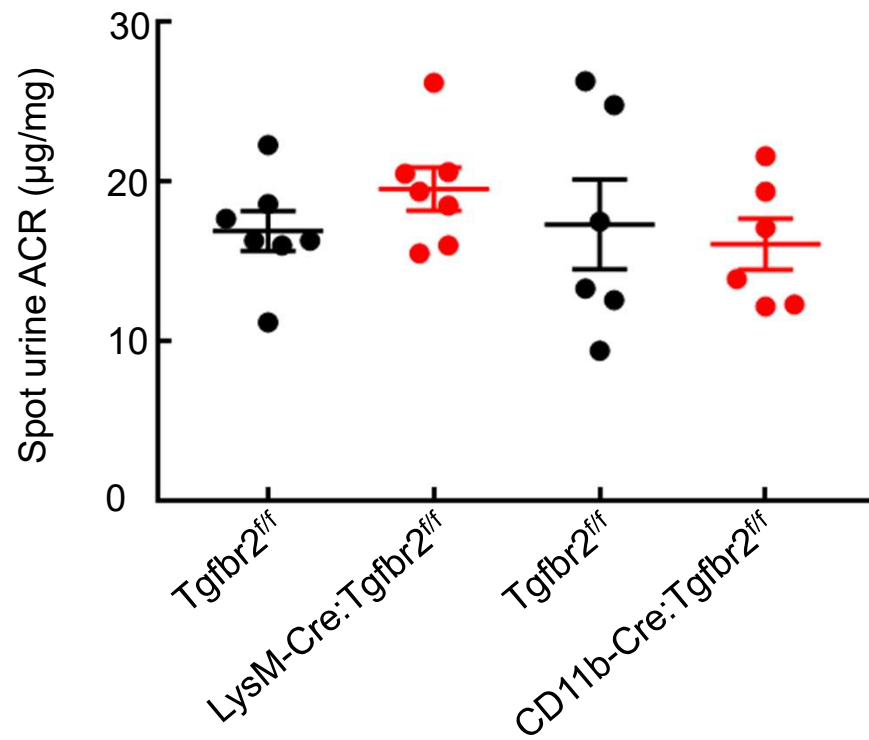

Supplemental Figure S2

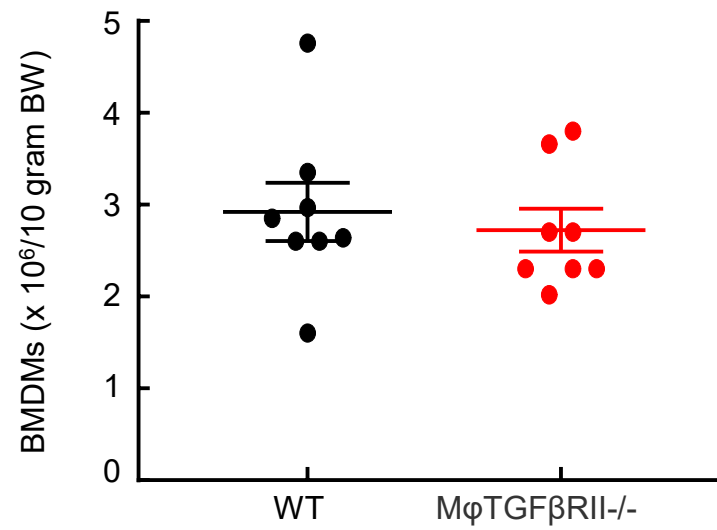

Supplemental Figure S3

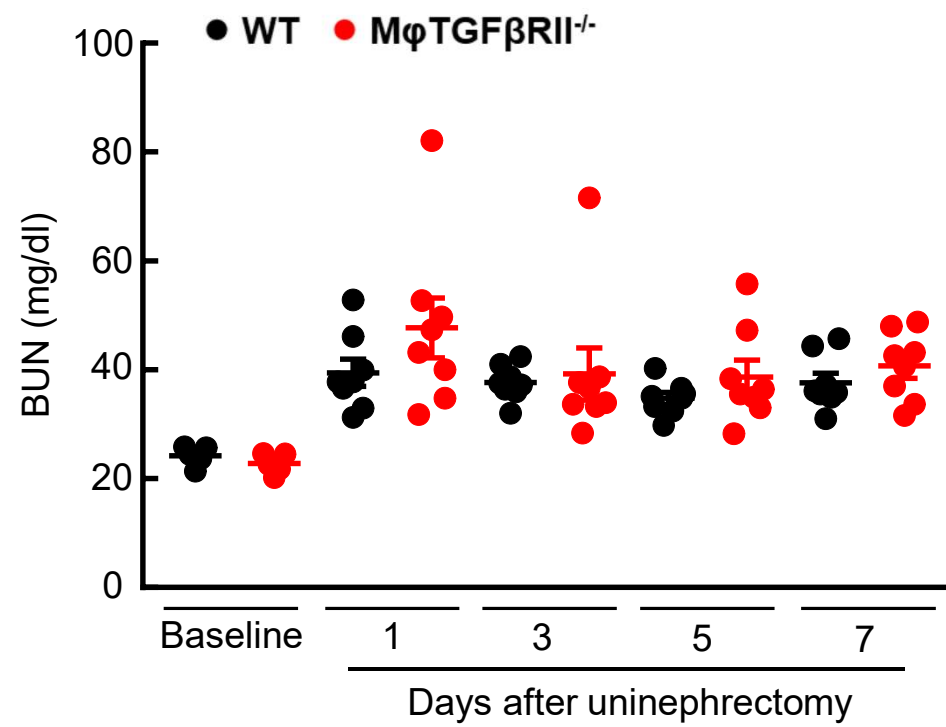

Supplemental Figure S4

A

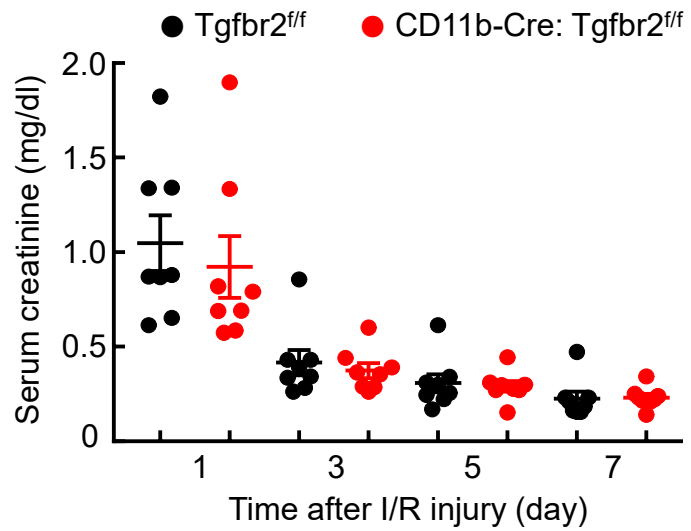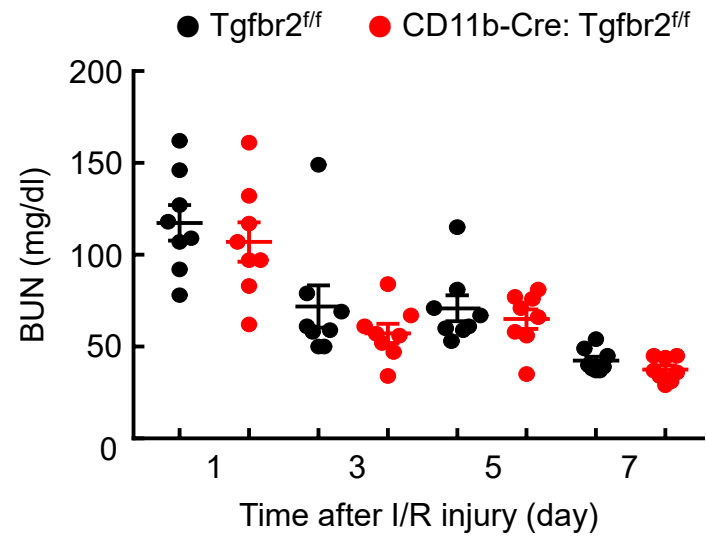

B

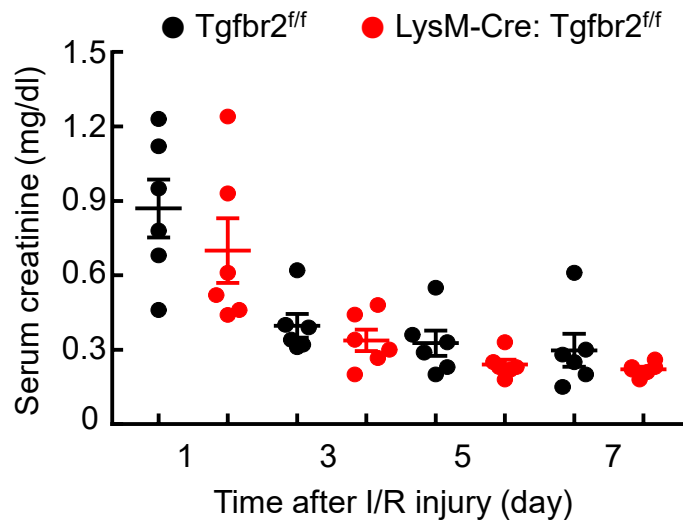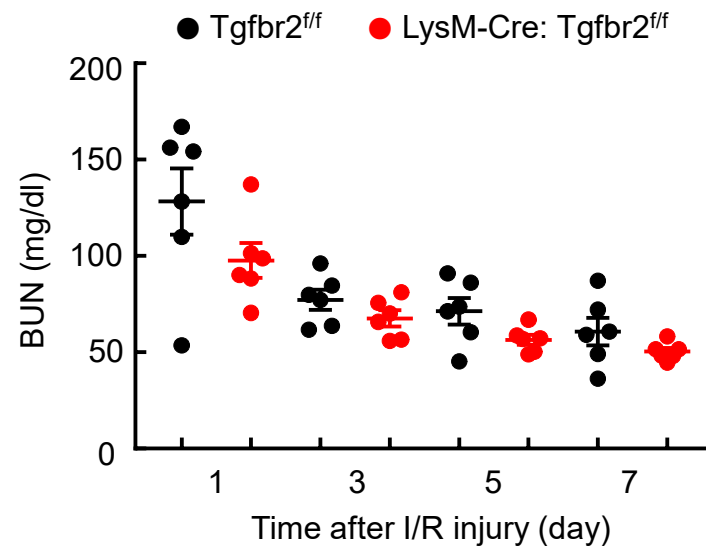

Supplemental Figure S5

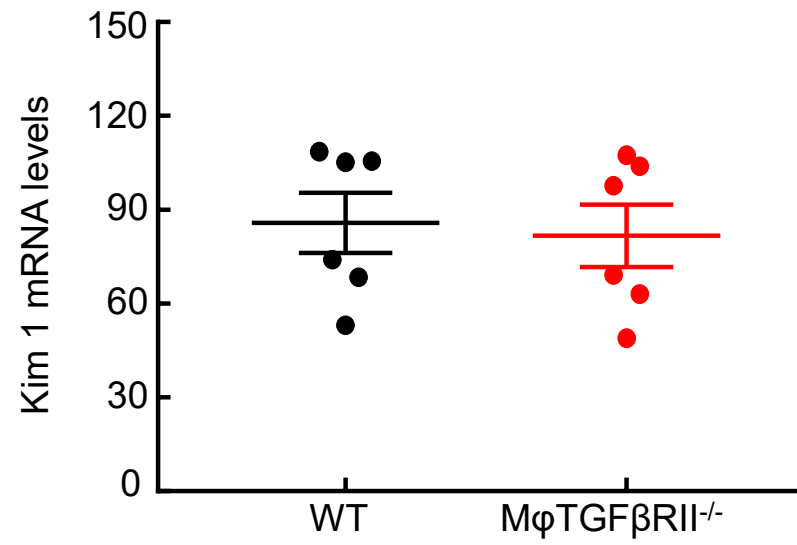

Supplemental Figure S6

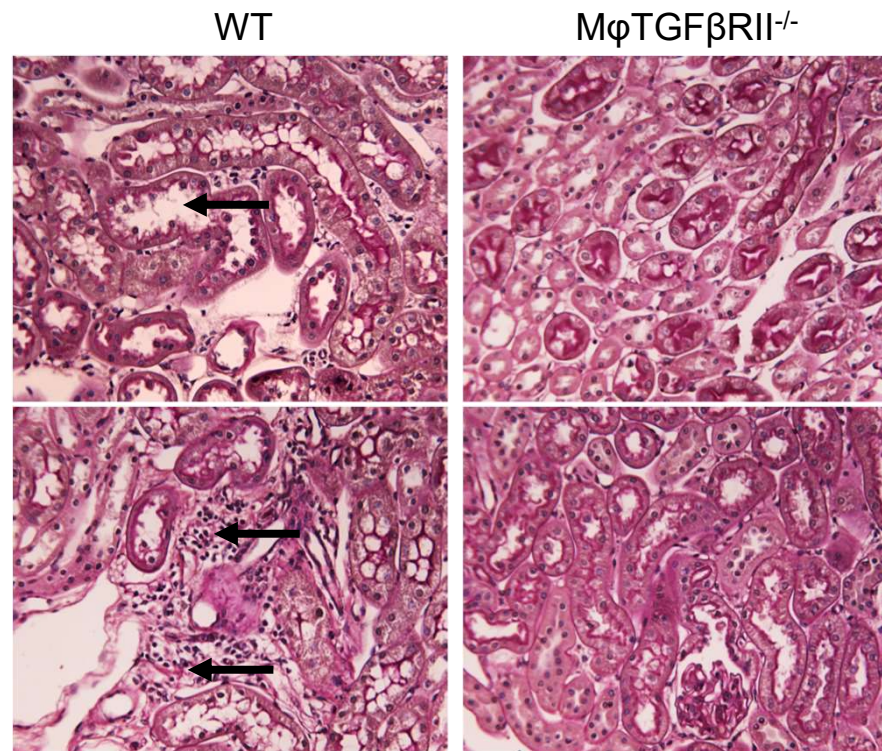

The Periodic Acid-Schiff staining: x 160.

Supplemental Figure S7

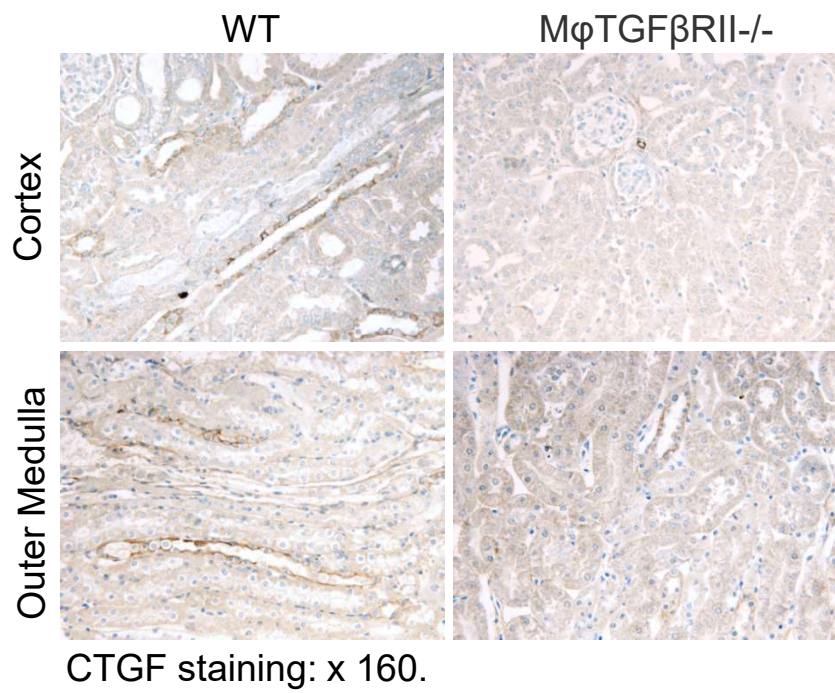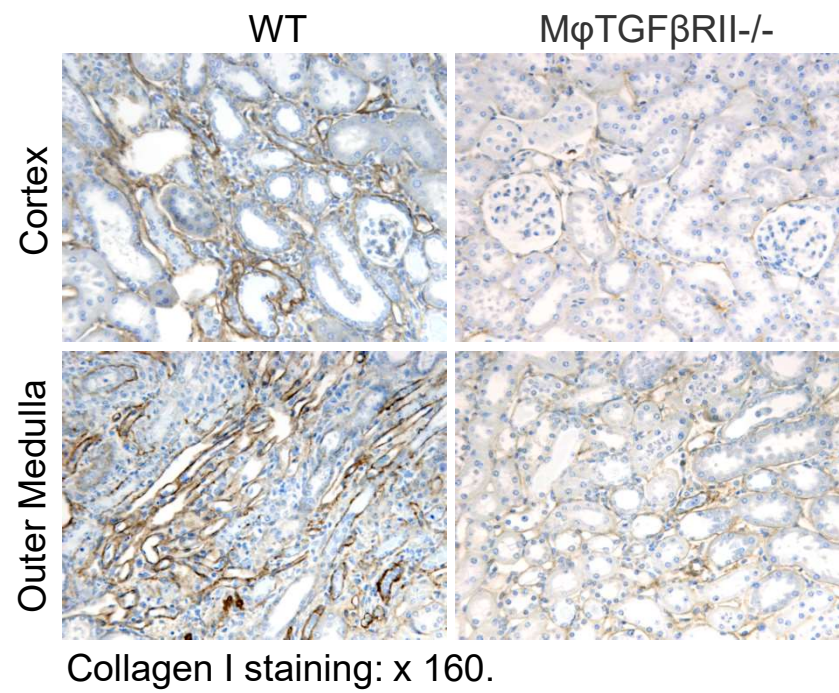

Supplemental Figure S8



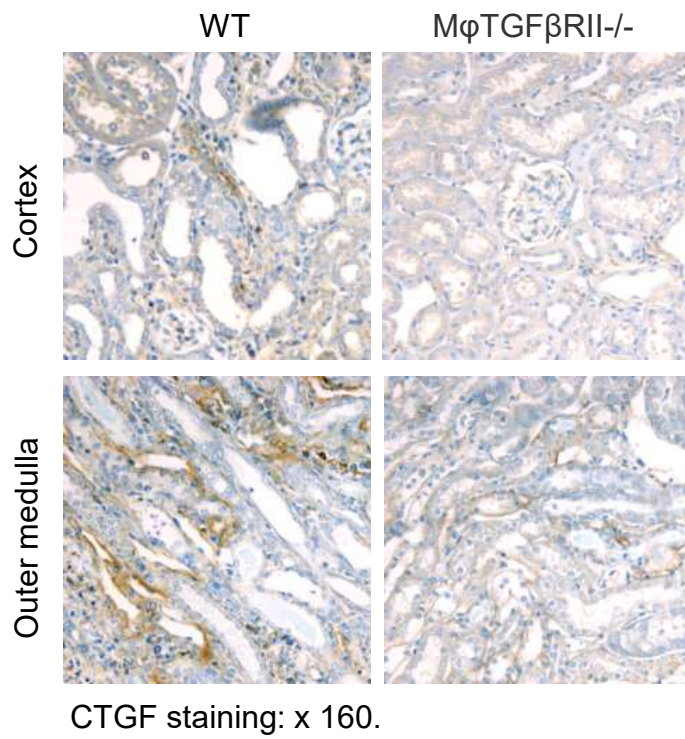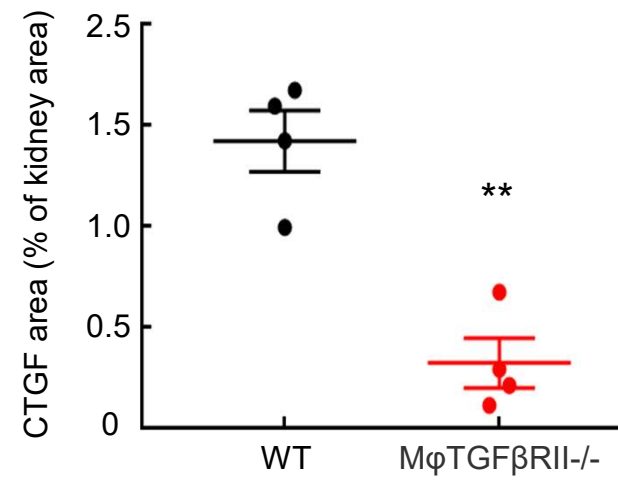

Supplemental Figure S9

Tgfr2<sup>ff</sup>  
HB-EGF<sup>Tg/Tg</sup>

MφTGFβRII<sup>-/-</sup>  
hHB-EGF<sup>Tg/Tg</sup>

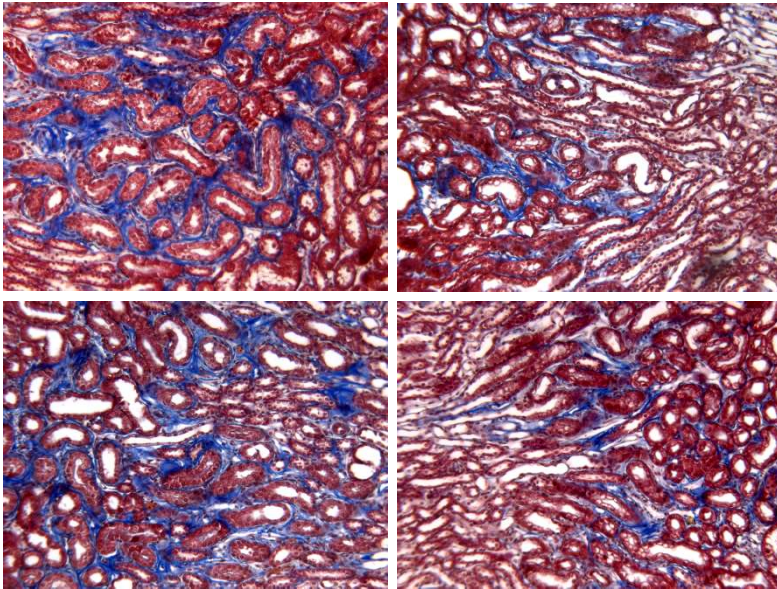

Masson's Trichrome staining: x 100.

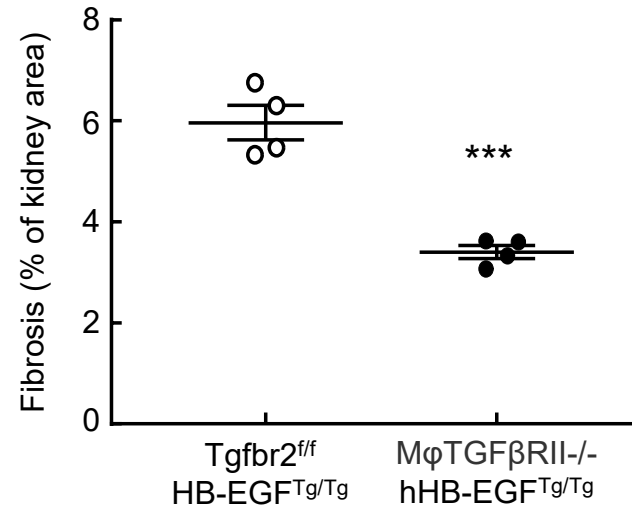

Supplemental Figure S10

A

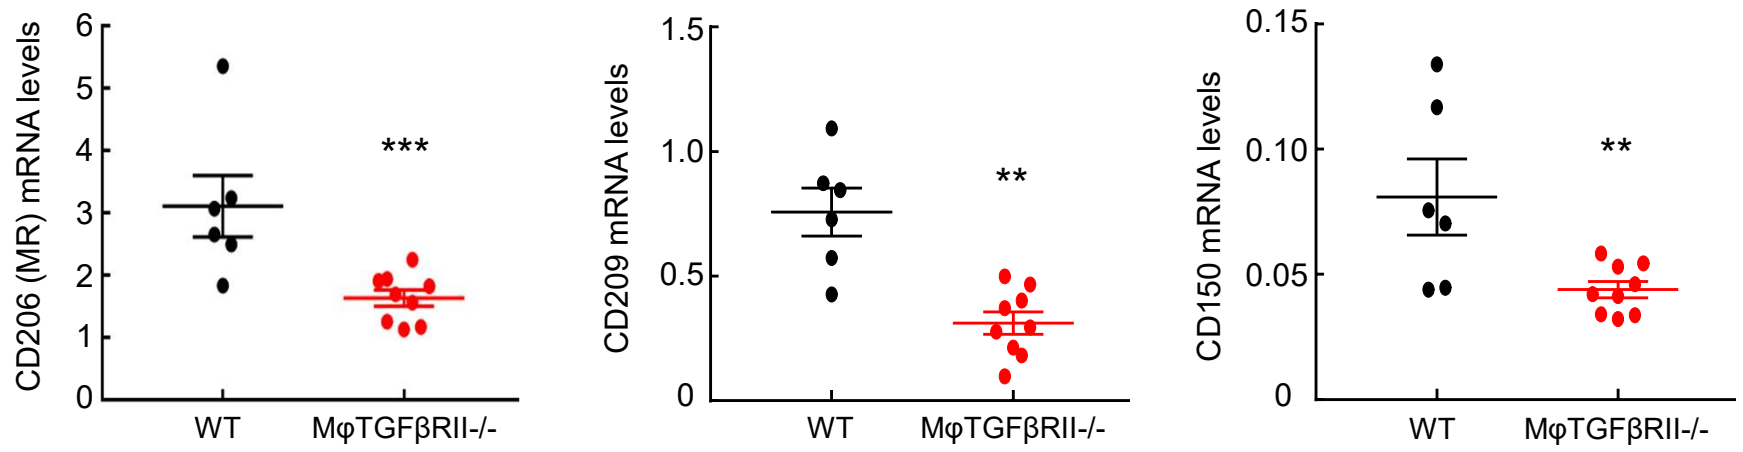

B

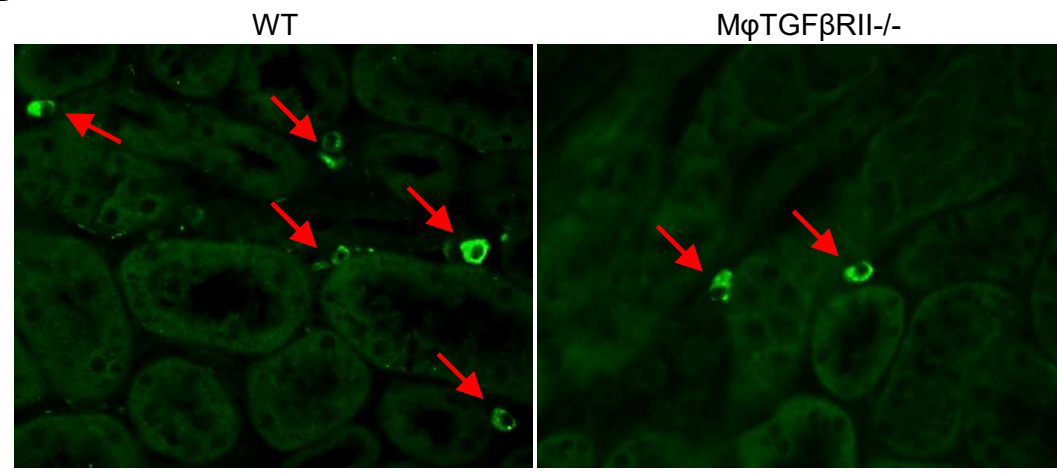

CD 206 (MR) staining: x 400.

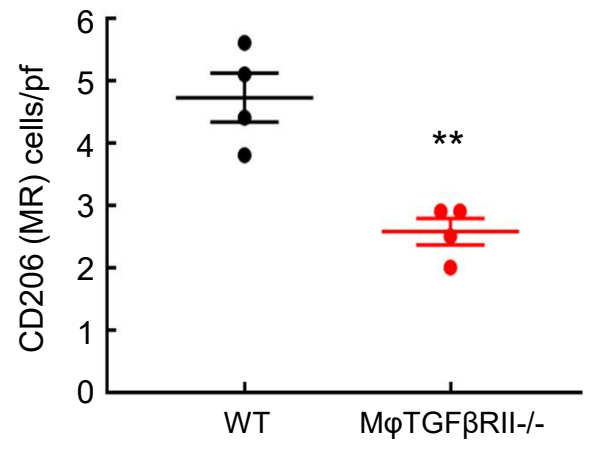

Supplemental Figure S11

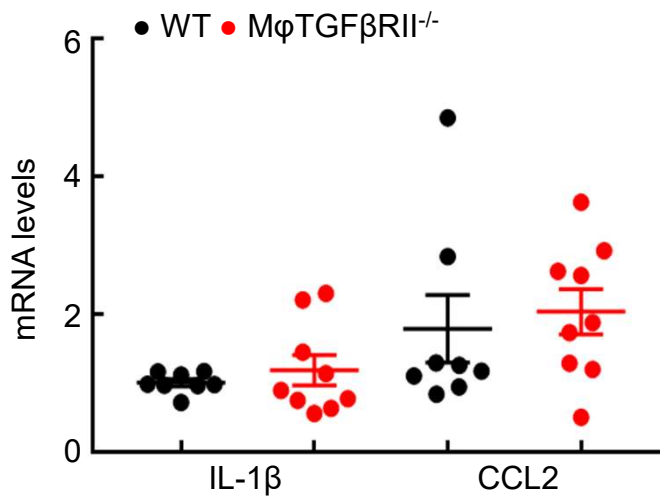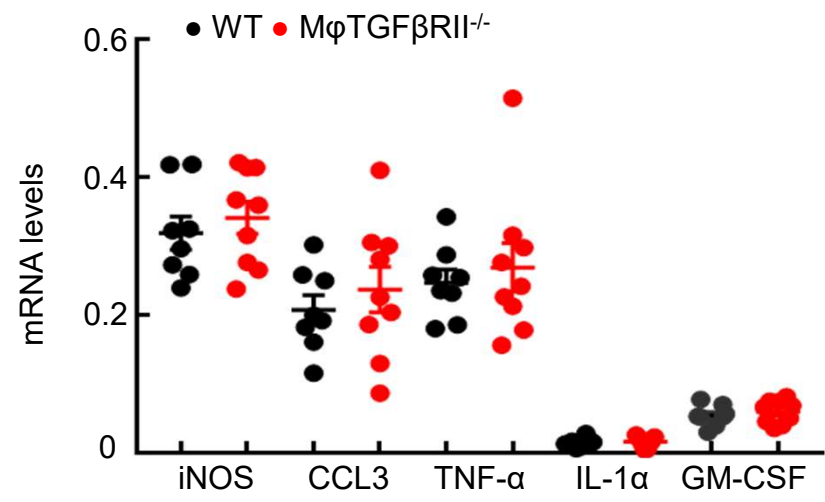

Supplemental Figure S12

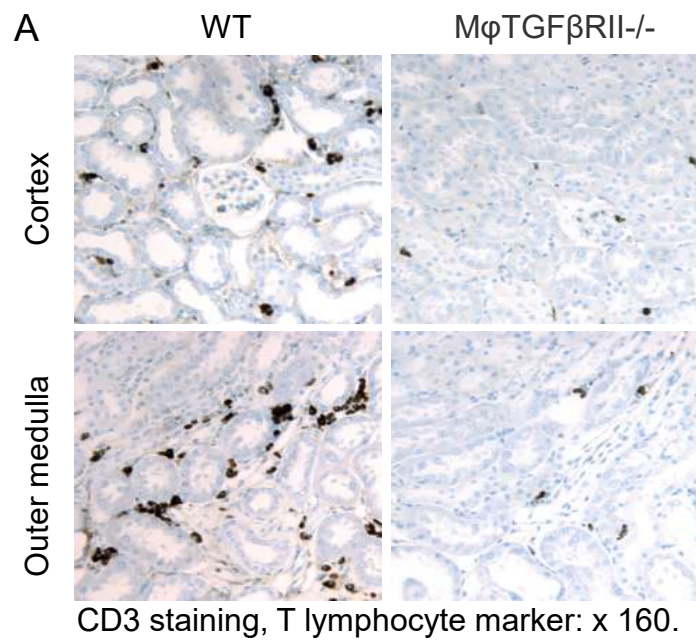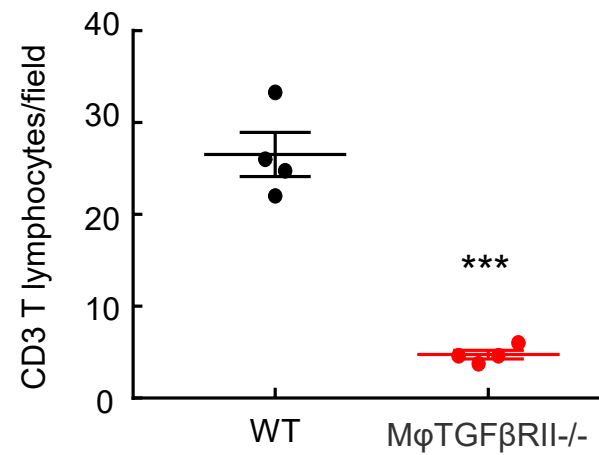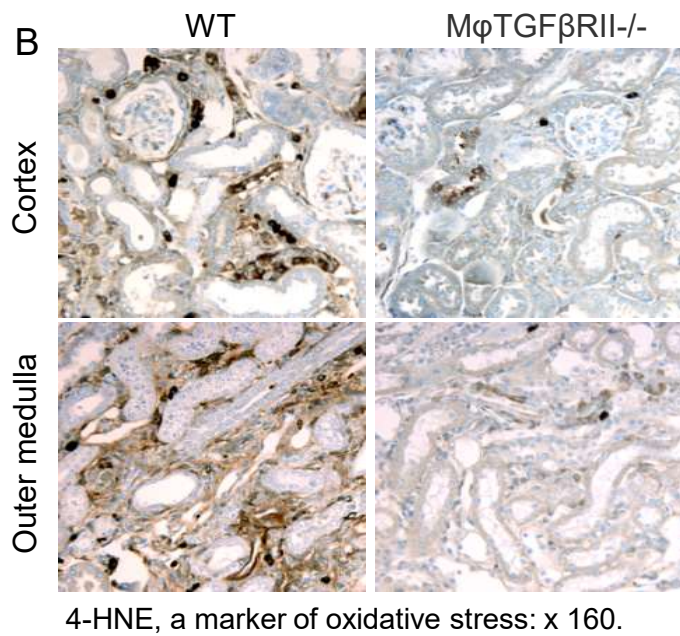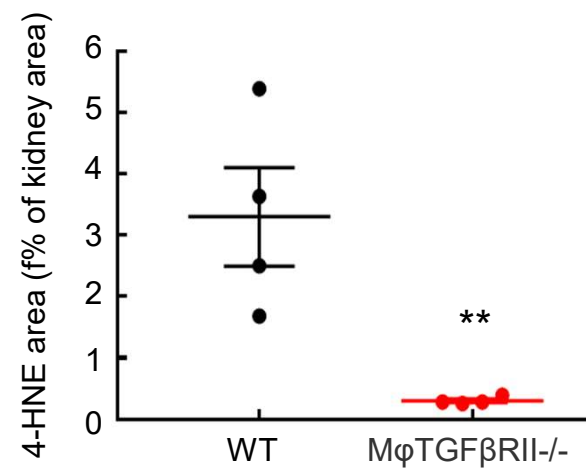

Supplemental Figure S13

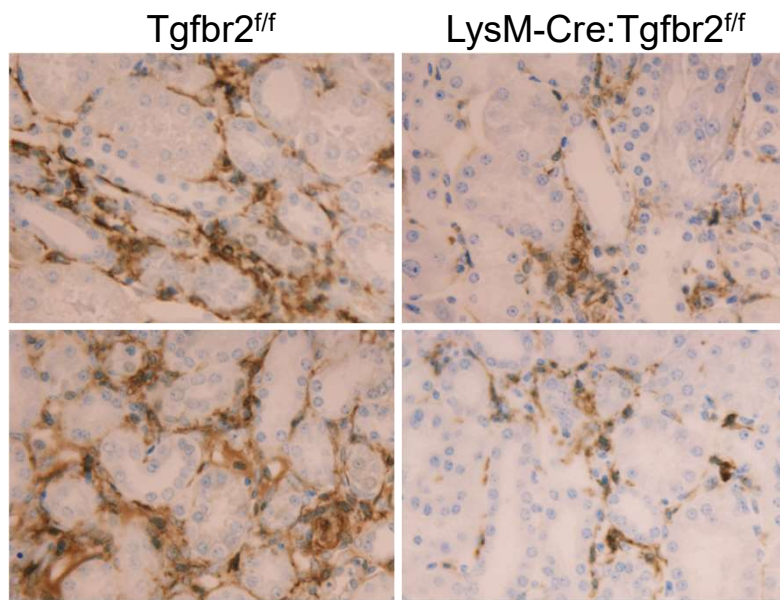

F4/80 staining, macrophage marker: x 250

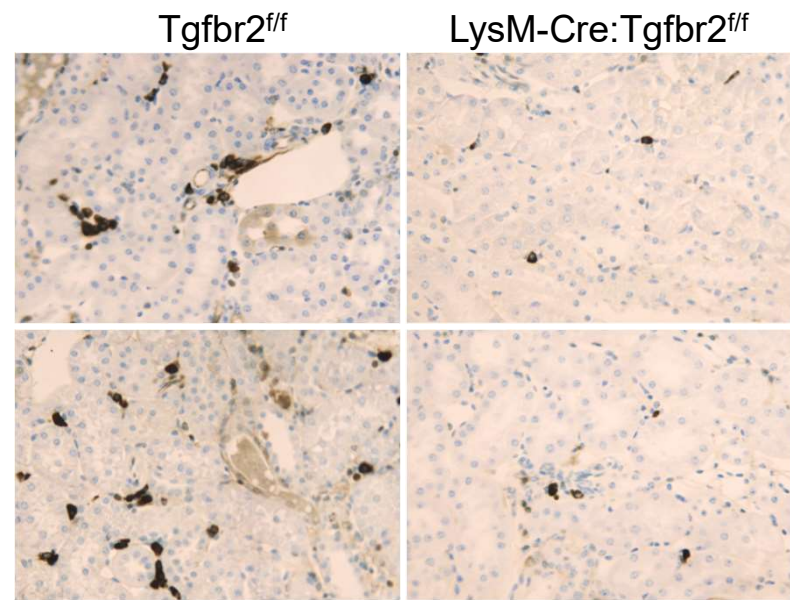

CD3 staining, T lymphocyte marker: x 160

Supplemental Figure S14

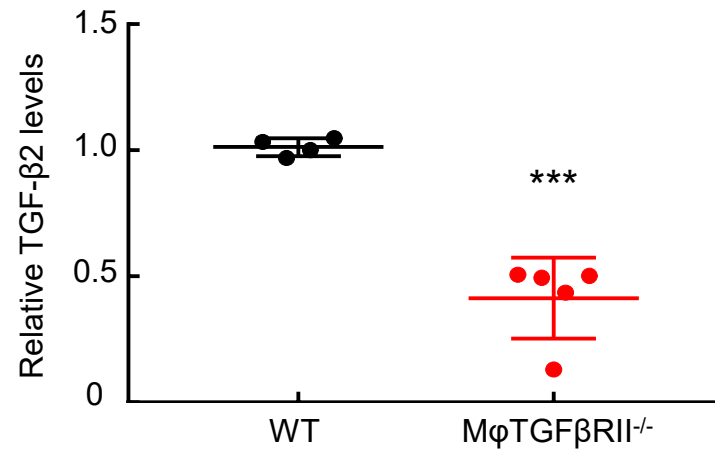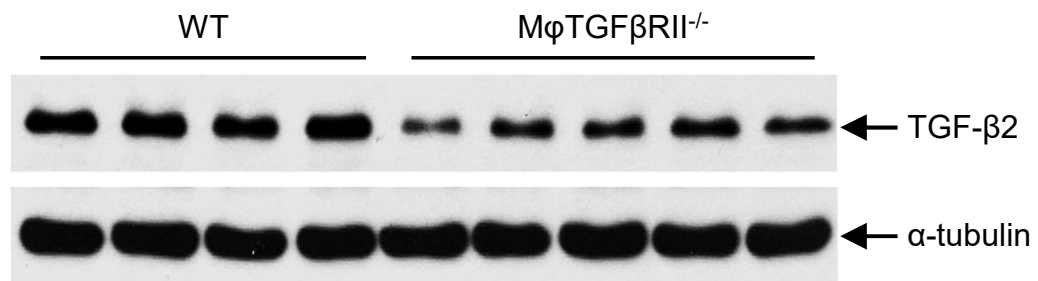

Supplemental Figure S15
